# Supplementary material for: State Divorce Laws, Reproductive Care Policies, and Pregnancy-Associated Homicide Rates, 2018-2021
Source: PubMed Central journal article supplement (PMC11549657; doi:10.1001/jamanetworkopen.2024.44199), 2024-11-08
Supplement: jamanetwopen-e2444199-s001.pdf [file jamanetwopen-e2444199-s001.pdf]

## Supplemental Online Content

Boyle KM, Regoeczi W, Meyer CB. State divorce laws, reproductive care policies, and pregnancy-associated homicide rates, 2018-2021. *JAMA Netw Open.* 2024;7(11):e2444199. doi:10.1001/jamanetworkopen.2024.44199

**eTable.** Specific Barriers to Abortion and Crude Rates of Pregnancy-Associated Homicide per 100,000 Females of Reproductive Age

This supplemental material has been provided by the authors to give readers additional information about their work.

**eTable.** Specific Barriers to Abortion and Crude Rates of Pregnancy-Associated Homicide per 100,000 Females of Reproductive Age

|                              | <u>Public funding</u> |          | <u>Waiting periods</u> |          | <u>Parental involvement</u> |          |
|------------------------------|-----------------------|----------|------------------------|----------|-----------------------------|----------|
|                              | z                     | <i>p</i> | z                      | <i>p</i> | z                           | <i>p</i> |
| Intimate partner rate        | 2.654                 | 0.007    | 3.535                  | < 0.001  | 2.643                       | 0.007    |
| Non-intimate partner rate    | 2.003                 | 0.04     | 3.528                  | < 0.001  | 2.458                       | 0.01     |
| Younger Black female rate    | 3.025                 | 0.002    | 5.065                  | < 0.001  | 4.215                       | < 0.001  |
| Younger Hispanic female rate | 0.989                 | 0.33     | 1.272                  | 0.20     | 0.569                       | 0.55     |
| Younger White female rate    | 2.750                 | 0.004    | 3.834                  | < 0.001  | 2.846                       | 0.003    |

*Notes.* N=181 state-years. /z/ = absolute z score. Two-tailed test.
