# Supplementary material for: State Divorce Laws, Reproductive Care Policies, and Pregnancy-Associated Homicide Rates, 2018-2021
Source: PubMed Central journal article supplement (PMC11549657; doi:10.1001/jamanetworkopen.2024.44199), 2024-11-08
Supplement: jamanetwopen-e2444199-s002.pdf [file jamanetwopen-e2444199-s002.pdf]

## Data Sharing Statement

Boyle. State Divorce Laws, Reproductive Care Policies, and Pregnancy-Associated Homicide Rates, 2018-2021. *JAMA Netw Open*. Published November 08, 2024.

doi:10.1001/jamanetworkopen.2024.44199

### Data

**Data available:** No

### Additional Information

**Explanation for why data not available:** Data used to create the dataset are publicly available. The coding process by authors will be used in future research and thus will not be made available at this time.
